# Supplementary material for: Biodegradable porous silk microtubes for tissue vascularization
Source: Royal Society of Chemistry journal article supplement (doi:10.1039/c6tb02712a), 2016-12-21
Supplement: c6tb02712a1.pdf [file c6tb02712a1.pdf]

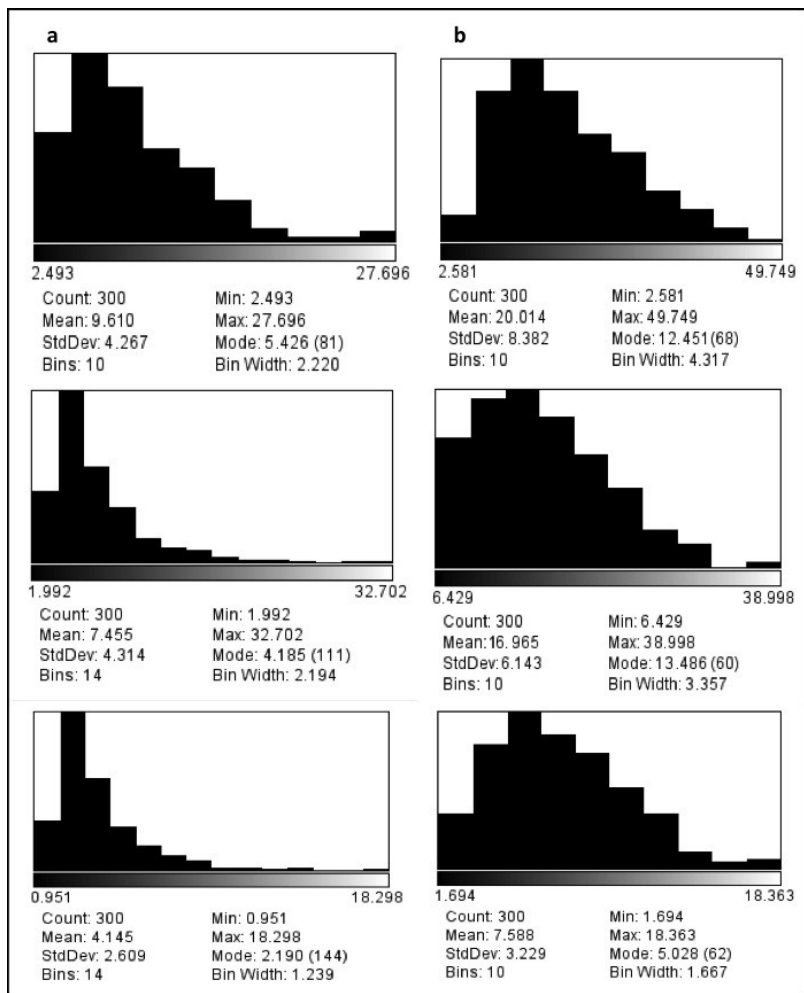

**Figure S1.** Porosity analysis by Image-J for silk and silk/PEO blends. **a.** Top to bottom: 13, 14 and 15% silk microtubes; **b.** Top to bottom: blends of PEO 1% and silk 13, 14 and 15% microtubes. Number of pores like a function of pore size (micrometers) for 300 measures is showed for each system. Mean values, maximum, minimal and mode, as well as Standard Deviation are indicated.
