# Supplementary material for: Biodegradable porous silk microtubes for tissue vascularization
Source: Royal Society of Chemistry journal article supplement (doi:10.1039/c6tb02712a), 2016-12-21
Supplement: c6tb02712a2.pdf [file c6tb02712a2.pdf]

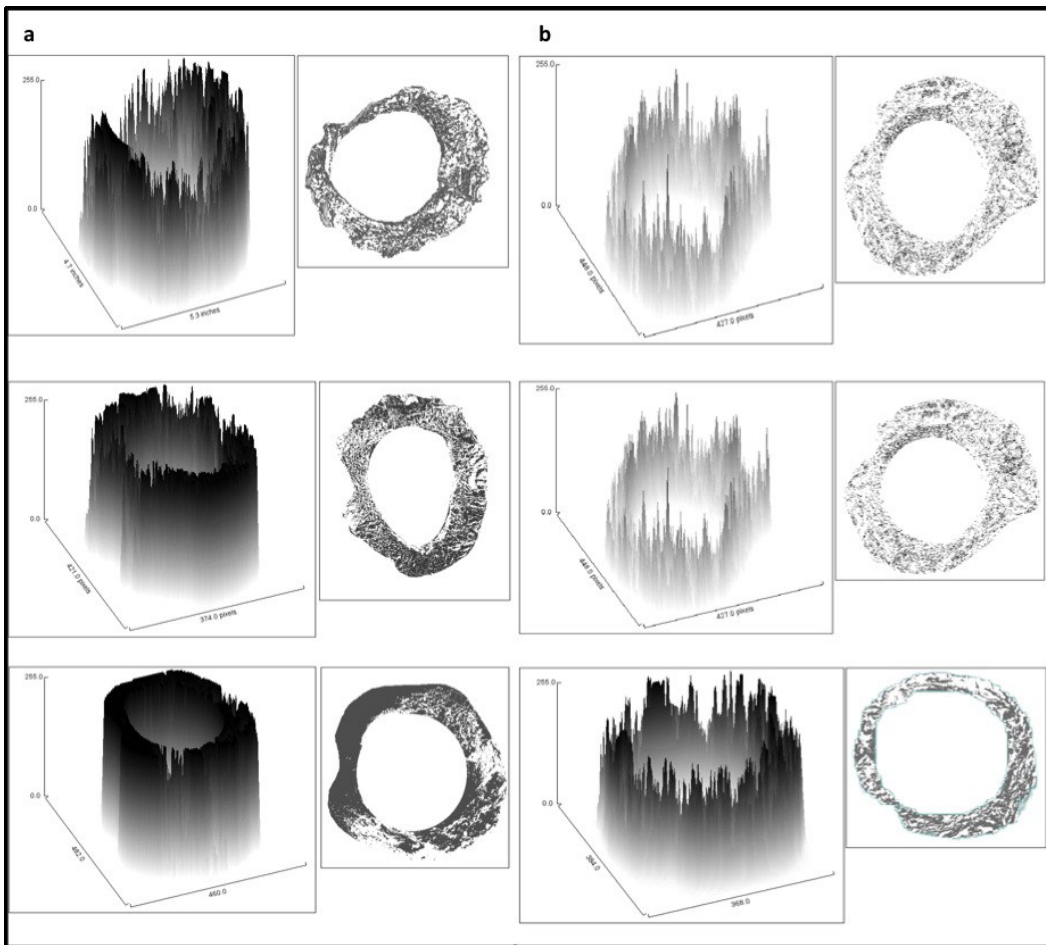

**Figure S2.** Topography analysis by Image-J for Silk and silk/PEO blends. **a.** Top to bottom: 13, 14 and 15% Silk microtubes, **b.** Top to bottom: blends of PEO1% and Silk 13, 14 and 15% microtubes. Based on SEM images, binary analysis of transversal cut microtubes are showing on the right of each plot.
