# Supplementary figures and images for: Biodegradable porous silk microtubes for tissue vascularization
Source: Royal Society of Chemistry journal article supplement (doi:10.1039/c6tb02712a), 2016-12-21

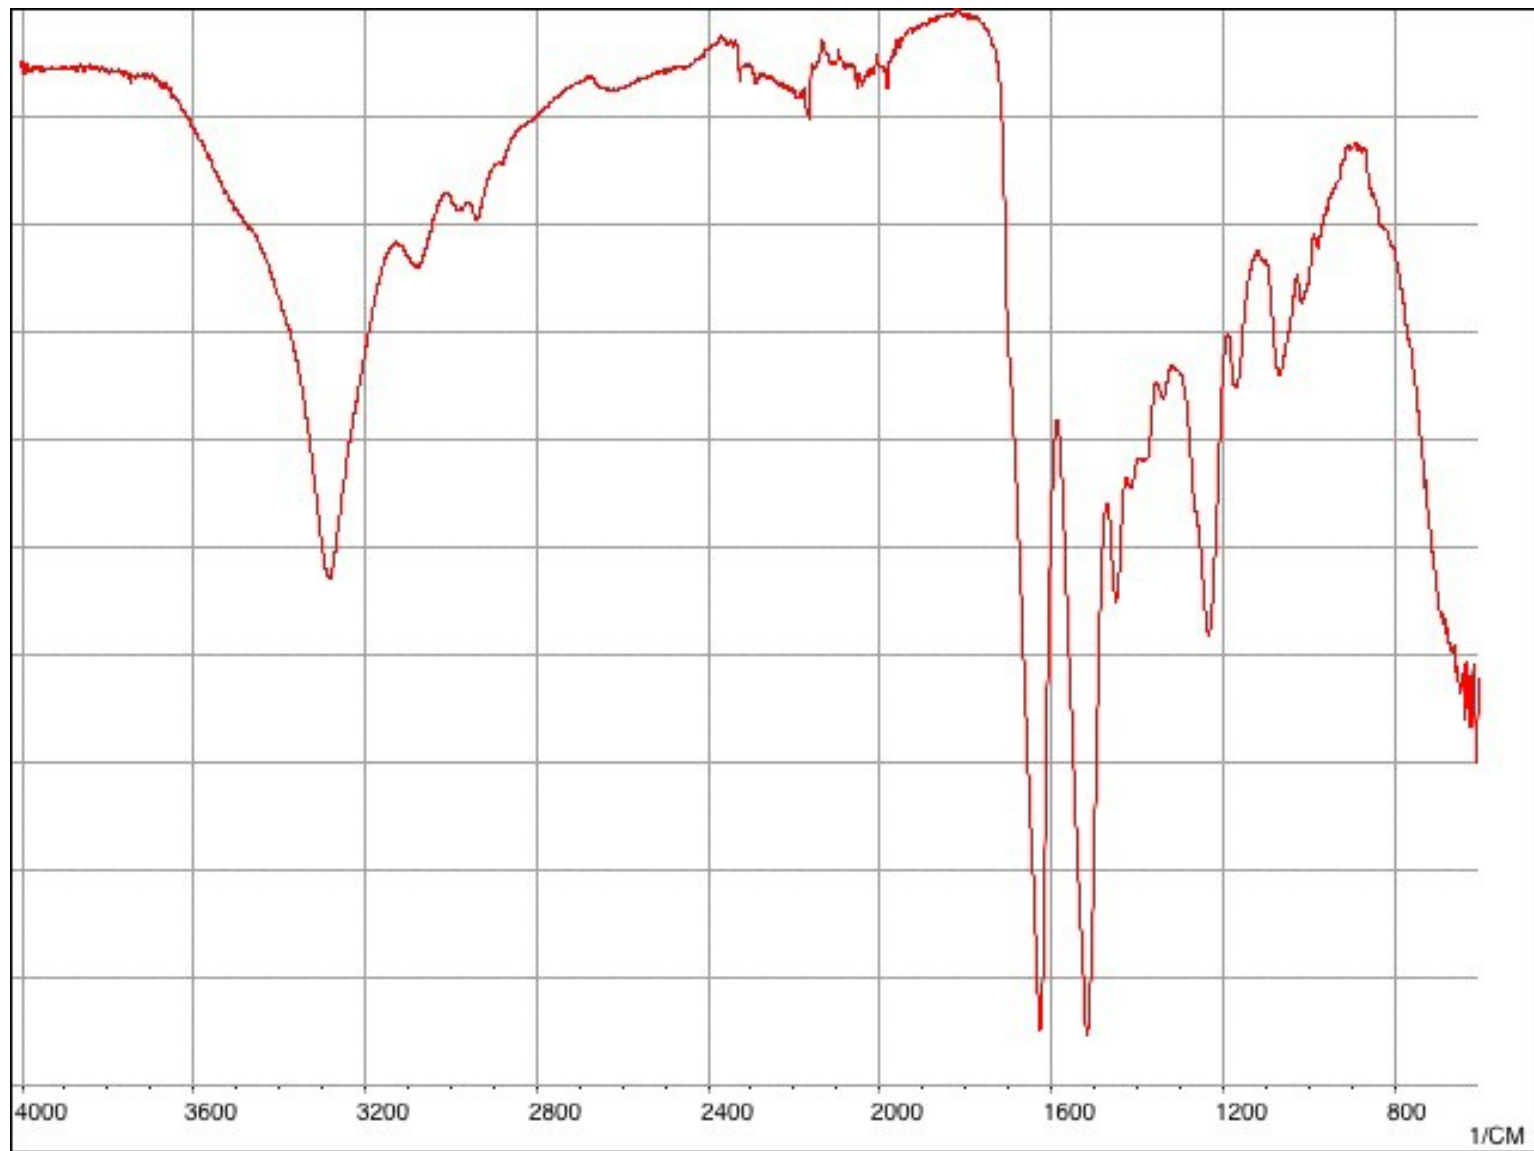

Supplement: c6tb02712a3.pdf [file c6tb02712a3.pdf]

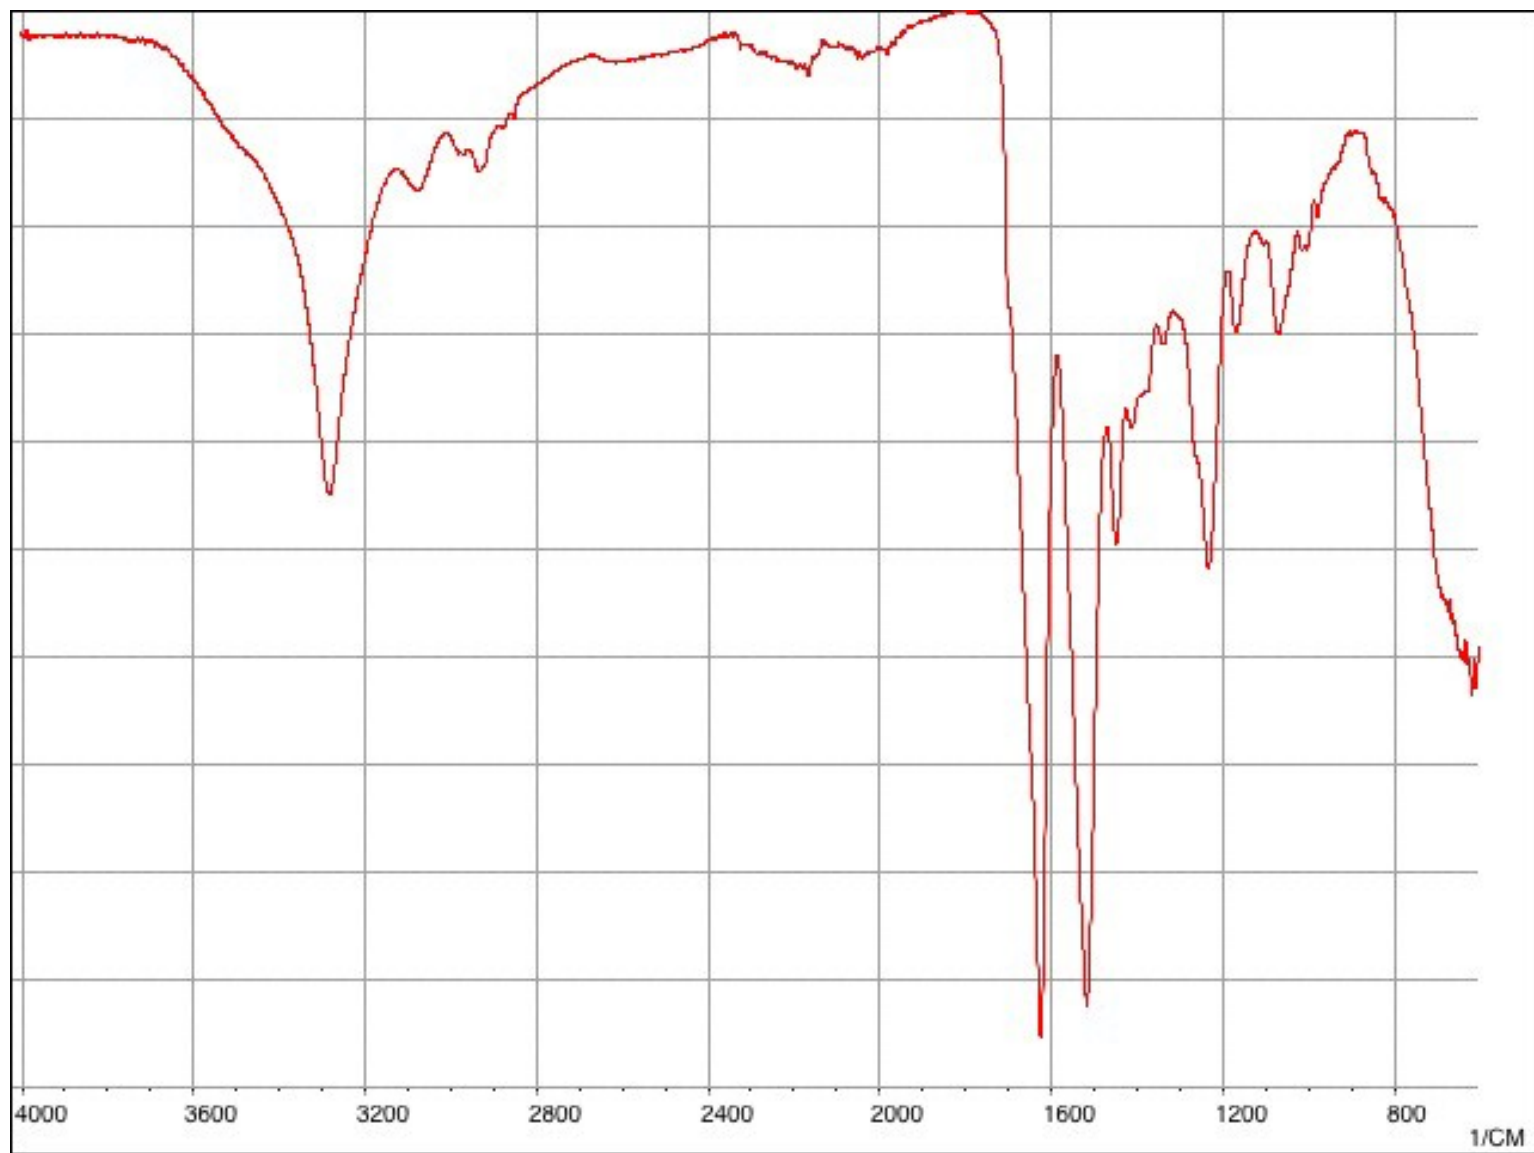

Supplement: c6tb02712a4.pdf [file c6tb02712a4.pdf]
